# Supplementary material for: Warm tropical oceans and ENSO flavours behind the late Holocene change in hydroclimates in northern South America
Source: Copernicus journal article supplement (doi:10.5194/egusphere-2022-1428), 2023-01-09

corr Jun–Aug monthly Berlin precipitation anomalies  
with Jun–Aug monthly HadISST1 SST anomalies 1976:2015  $p < 5\%$

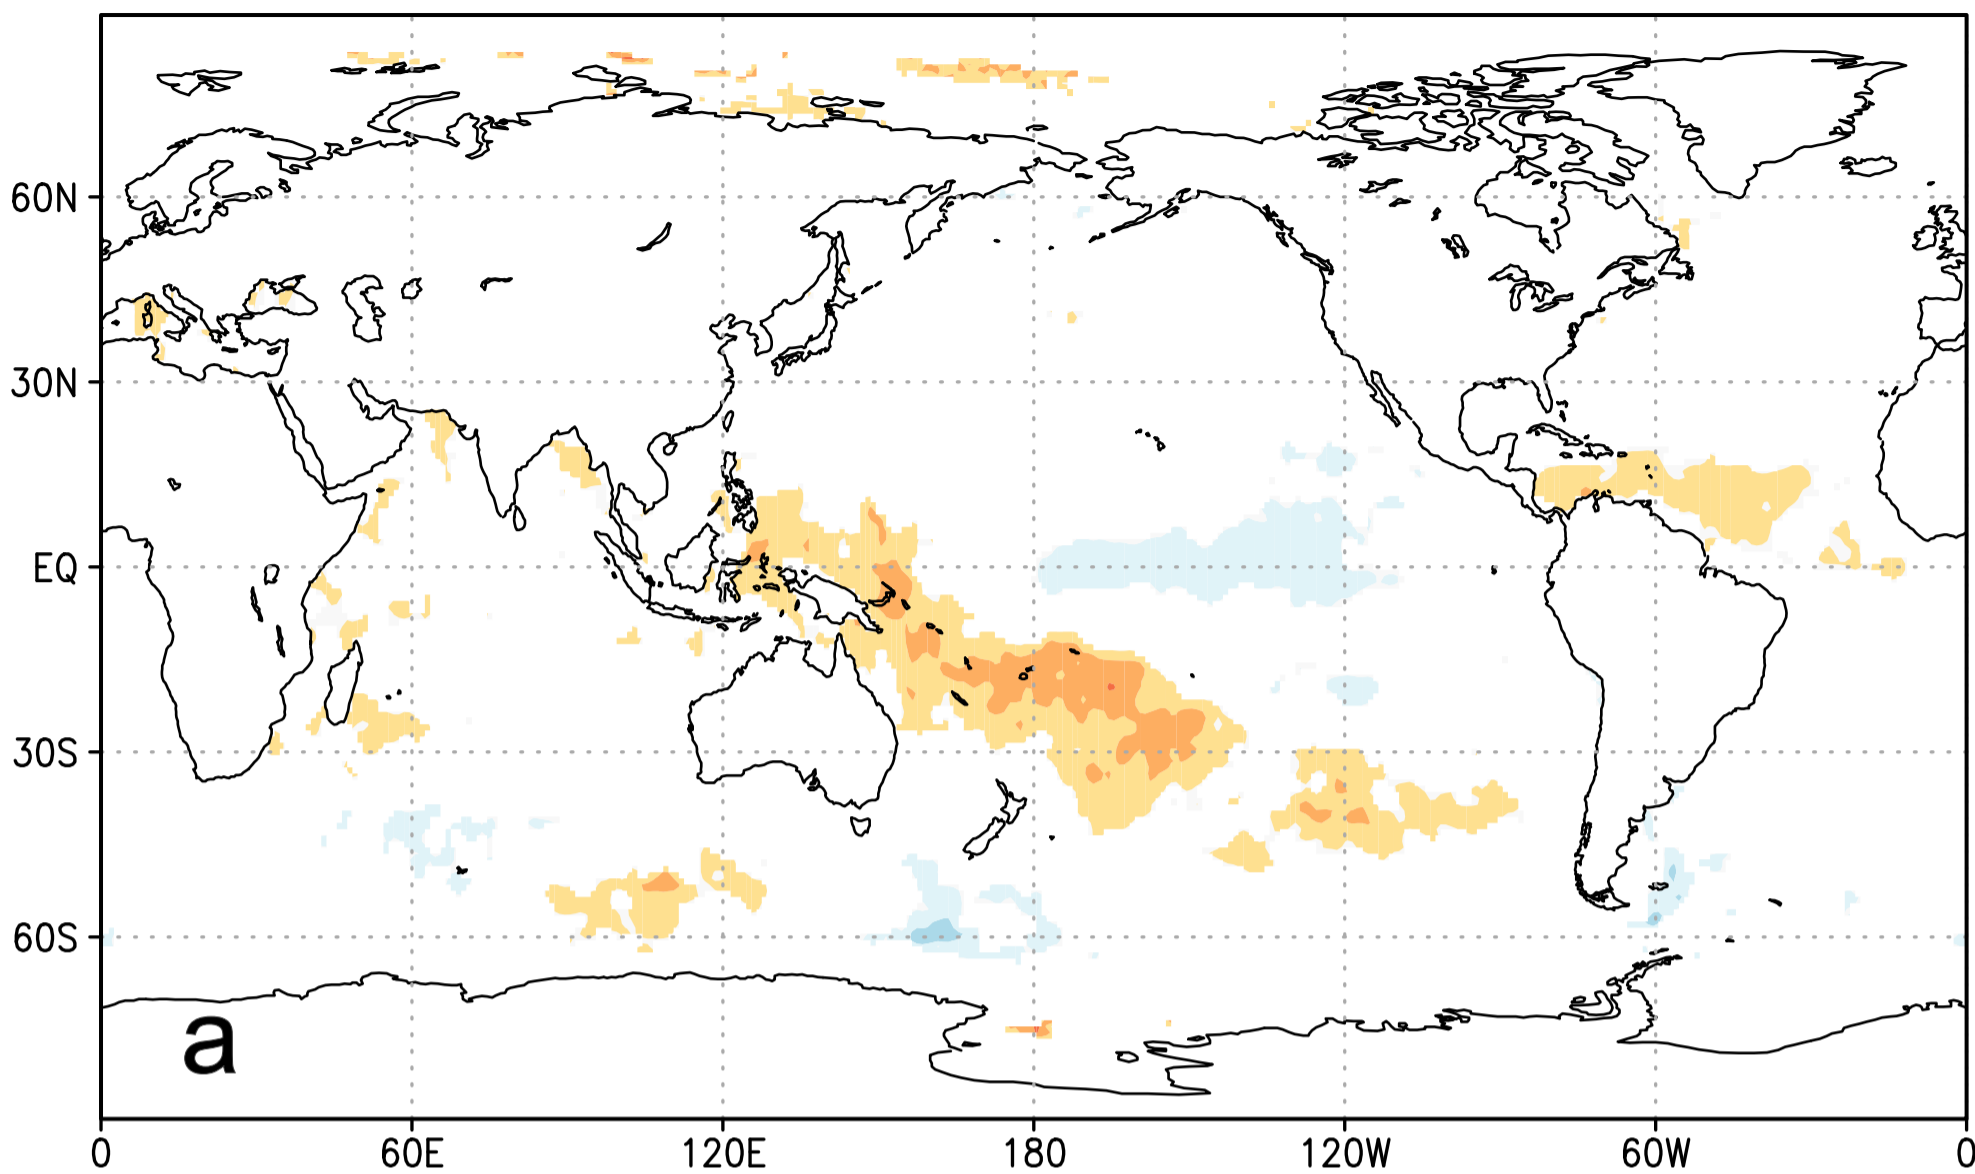

corr Jun–Aug monthly Berlin precipitation anomalies  
with Jun–Aug monthly ERA5 column vapour anomalies 1976:2015  $p < 5\%$

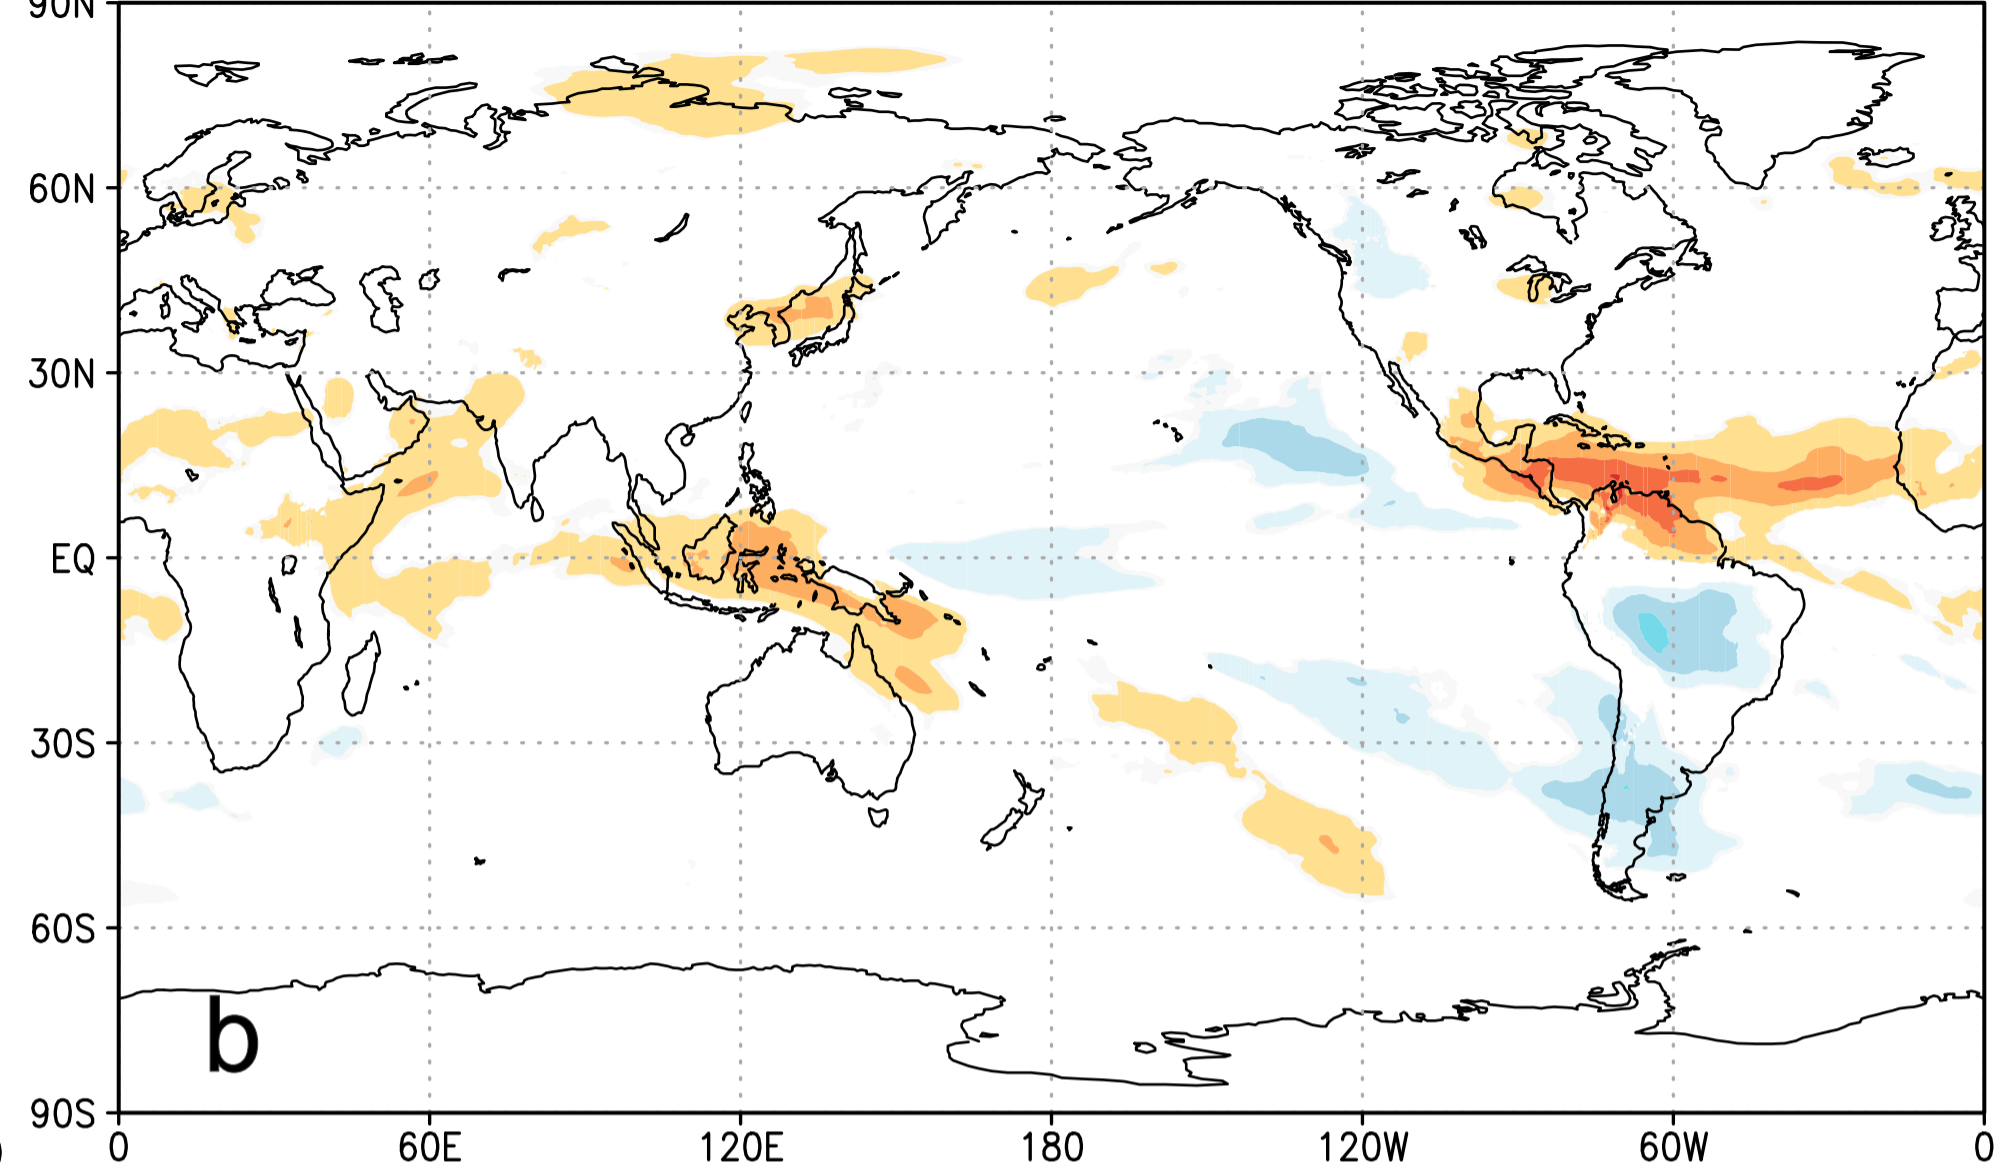

corr Dec–Feb monthly Berlin precipitation anomalies  
with Dec–Feb monthly HadISST1 SST anomalies 1976:2015  $p < 5\%$

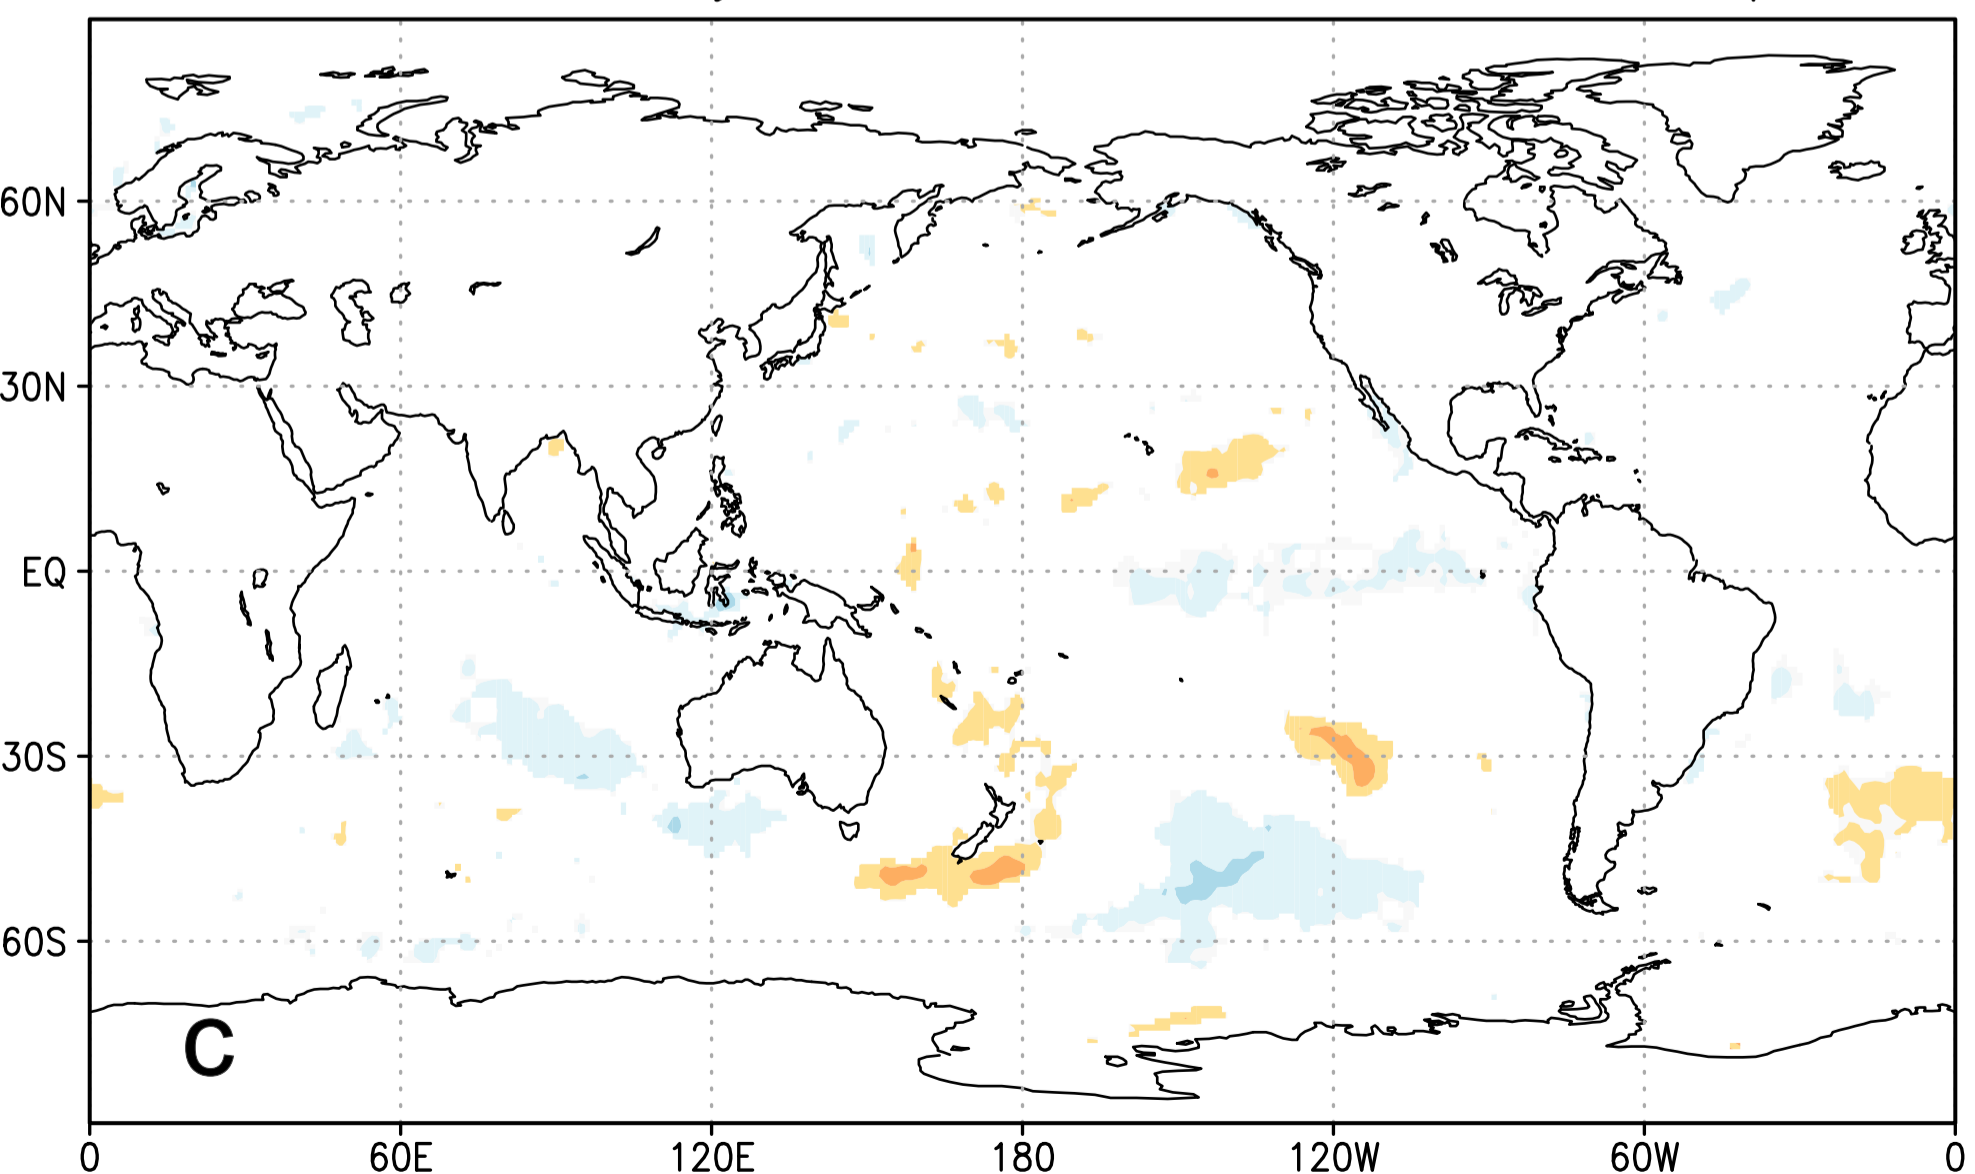

corr Dec–Feb monthly Berlin precipitation anomalies  
with Dec–Feb monthly ERA5 column vapour anomalies 1976:2015  $p < 5\%$

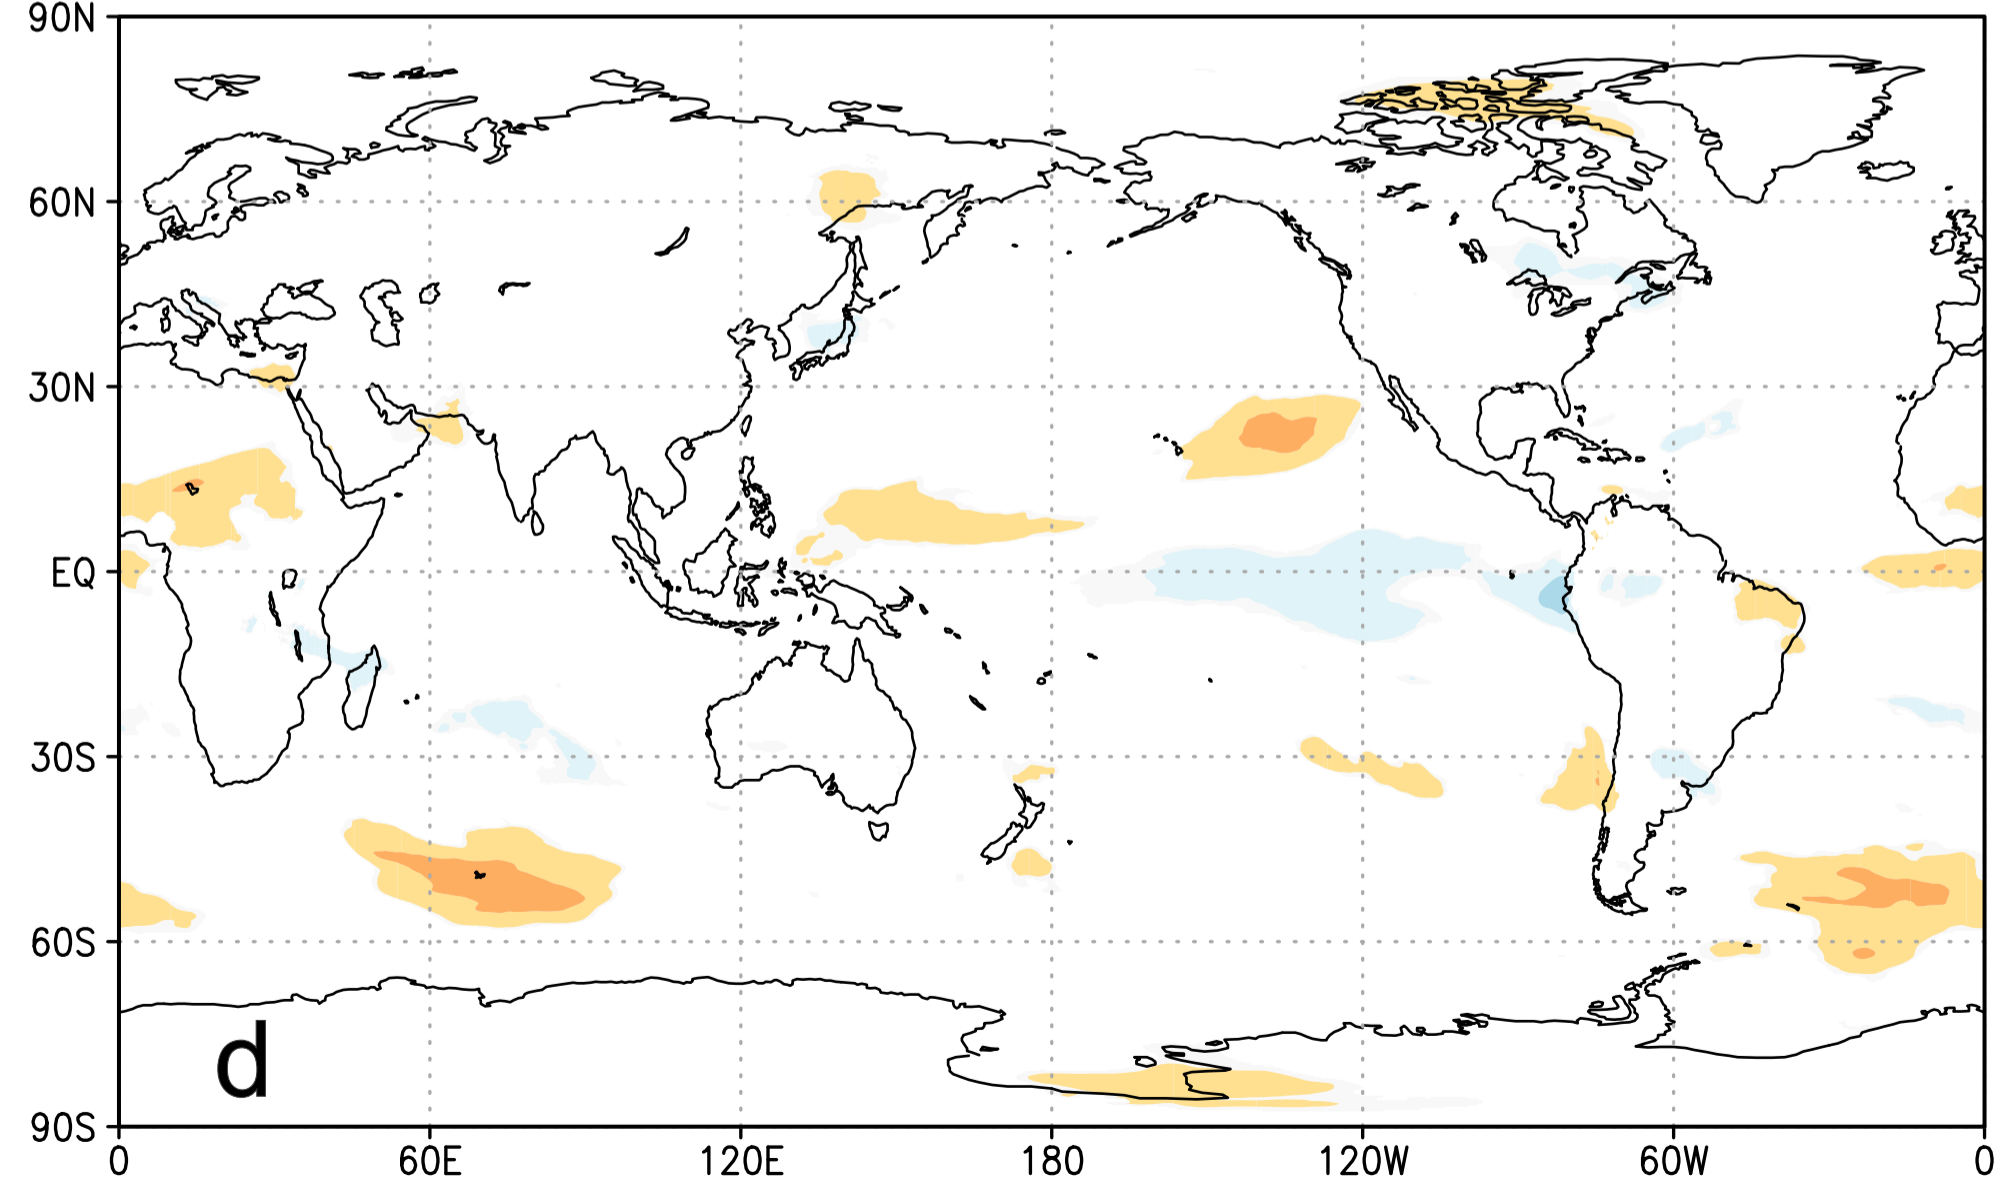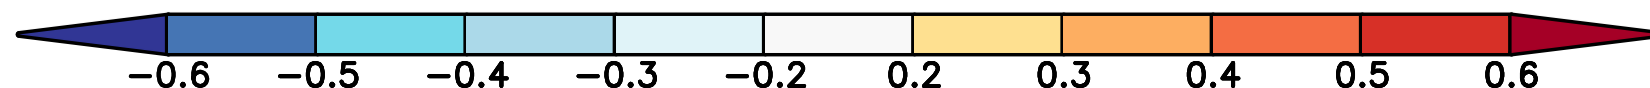

corr Jun–Aug monthly Mistrato precipitation anomalies  
with Jun–Aug monthly HadISST1 SST anomalies 1976:2015  $p < 5\%$

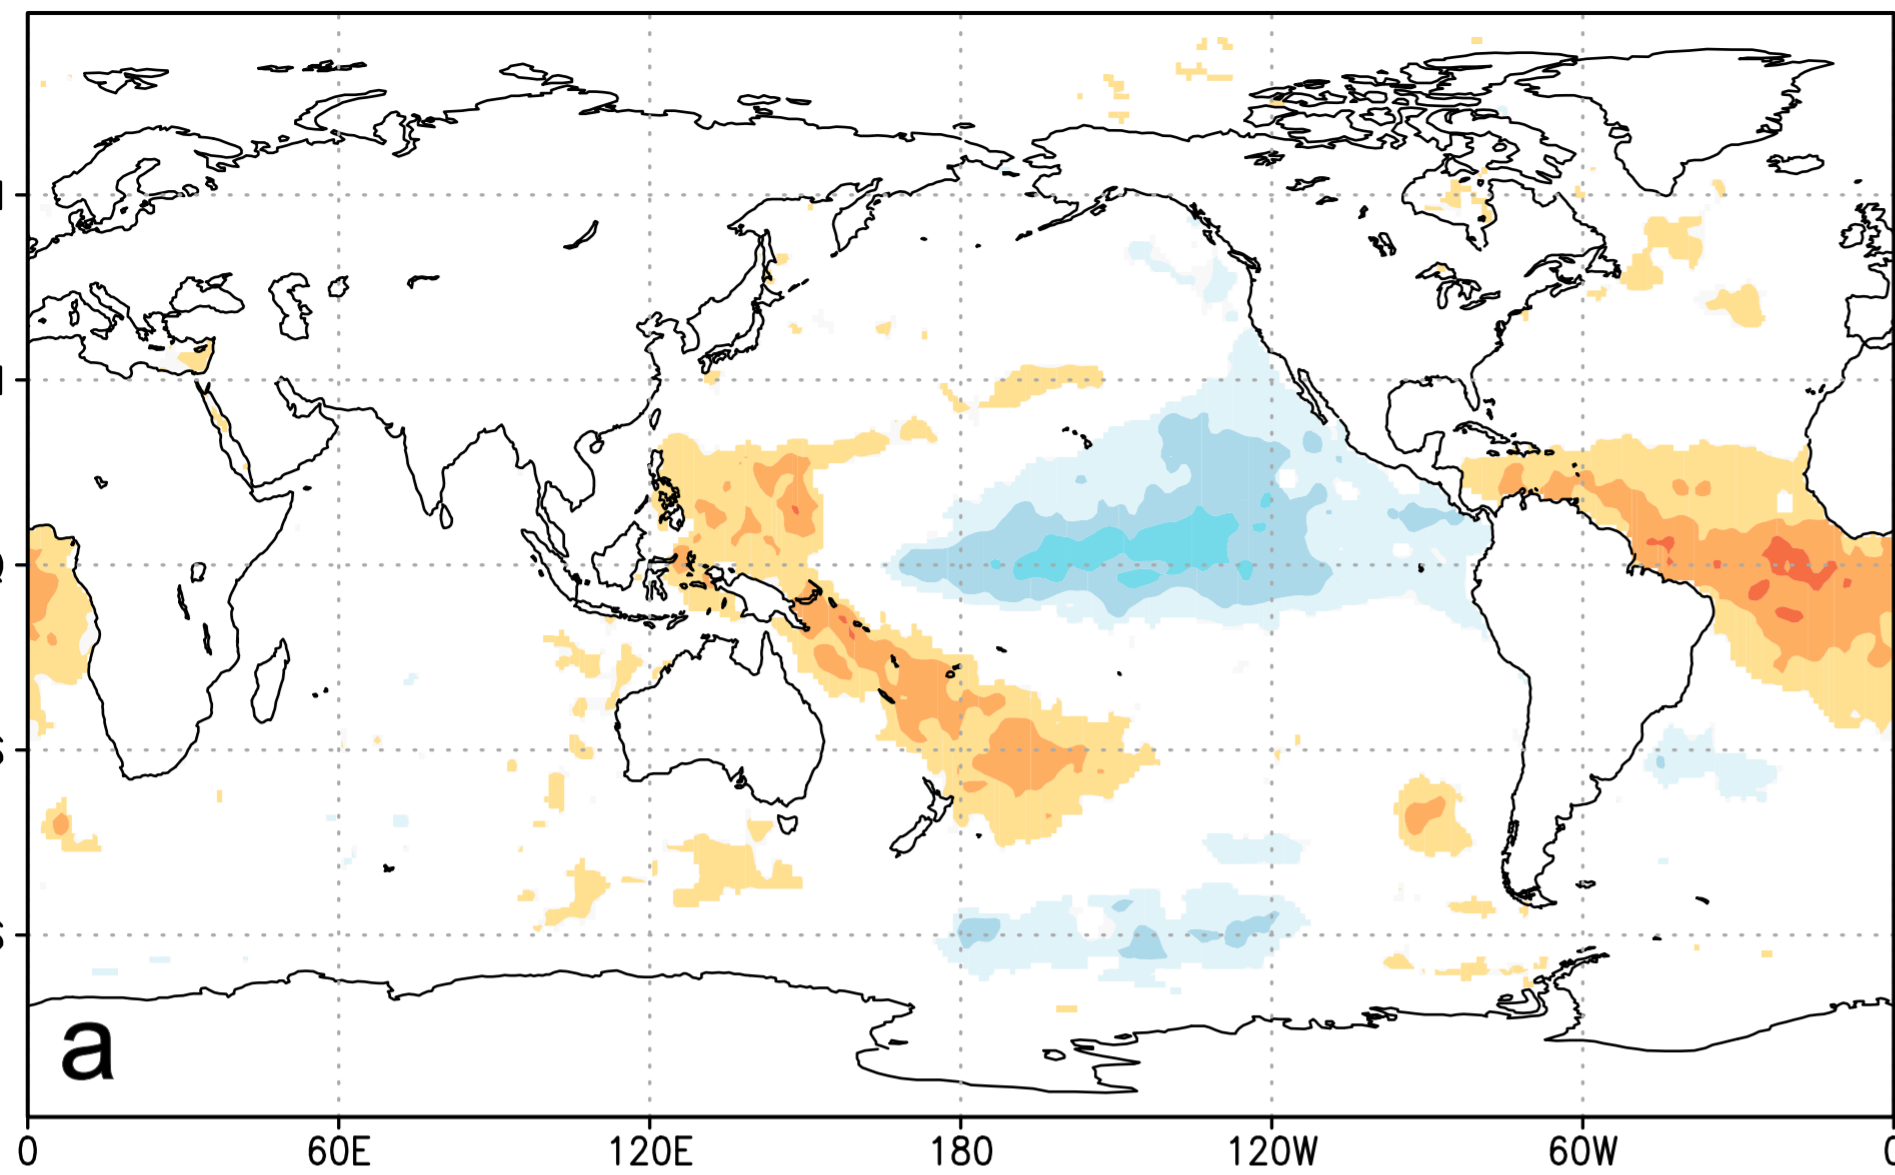

corr Jun–Aug monthly Mistrato precipitation anomalies  
with Jun–Aug monthly ERA5 column vapour anomalies 1976:2015  $p < 5\%$

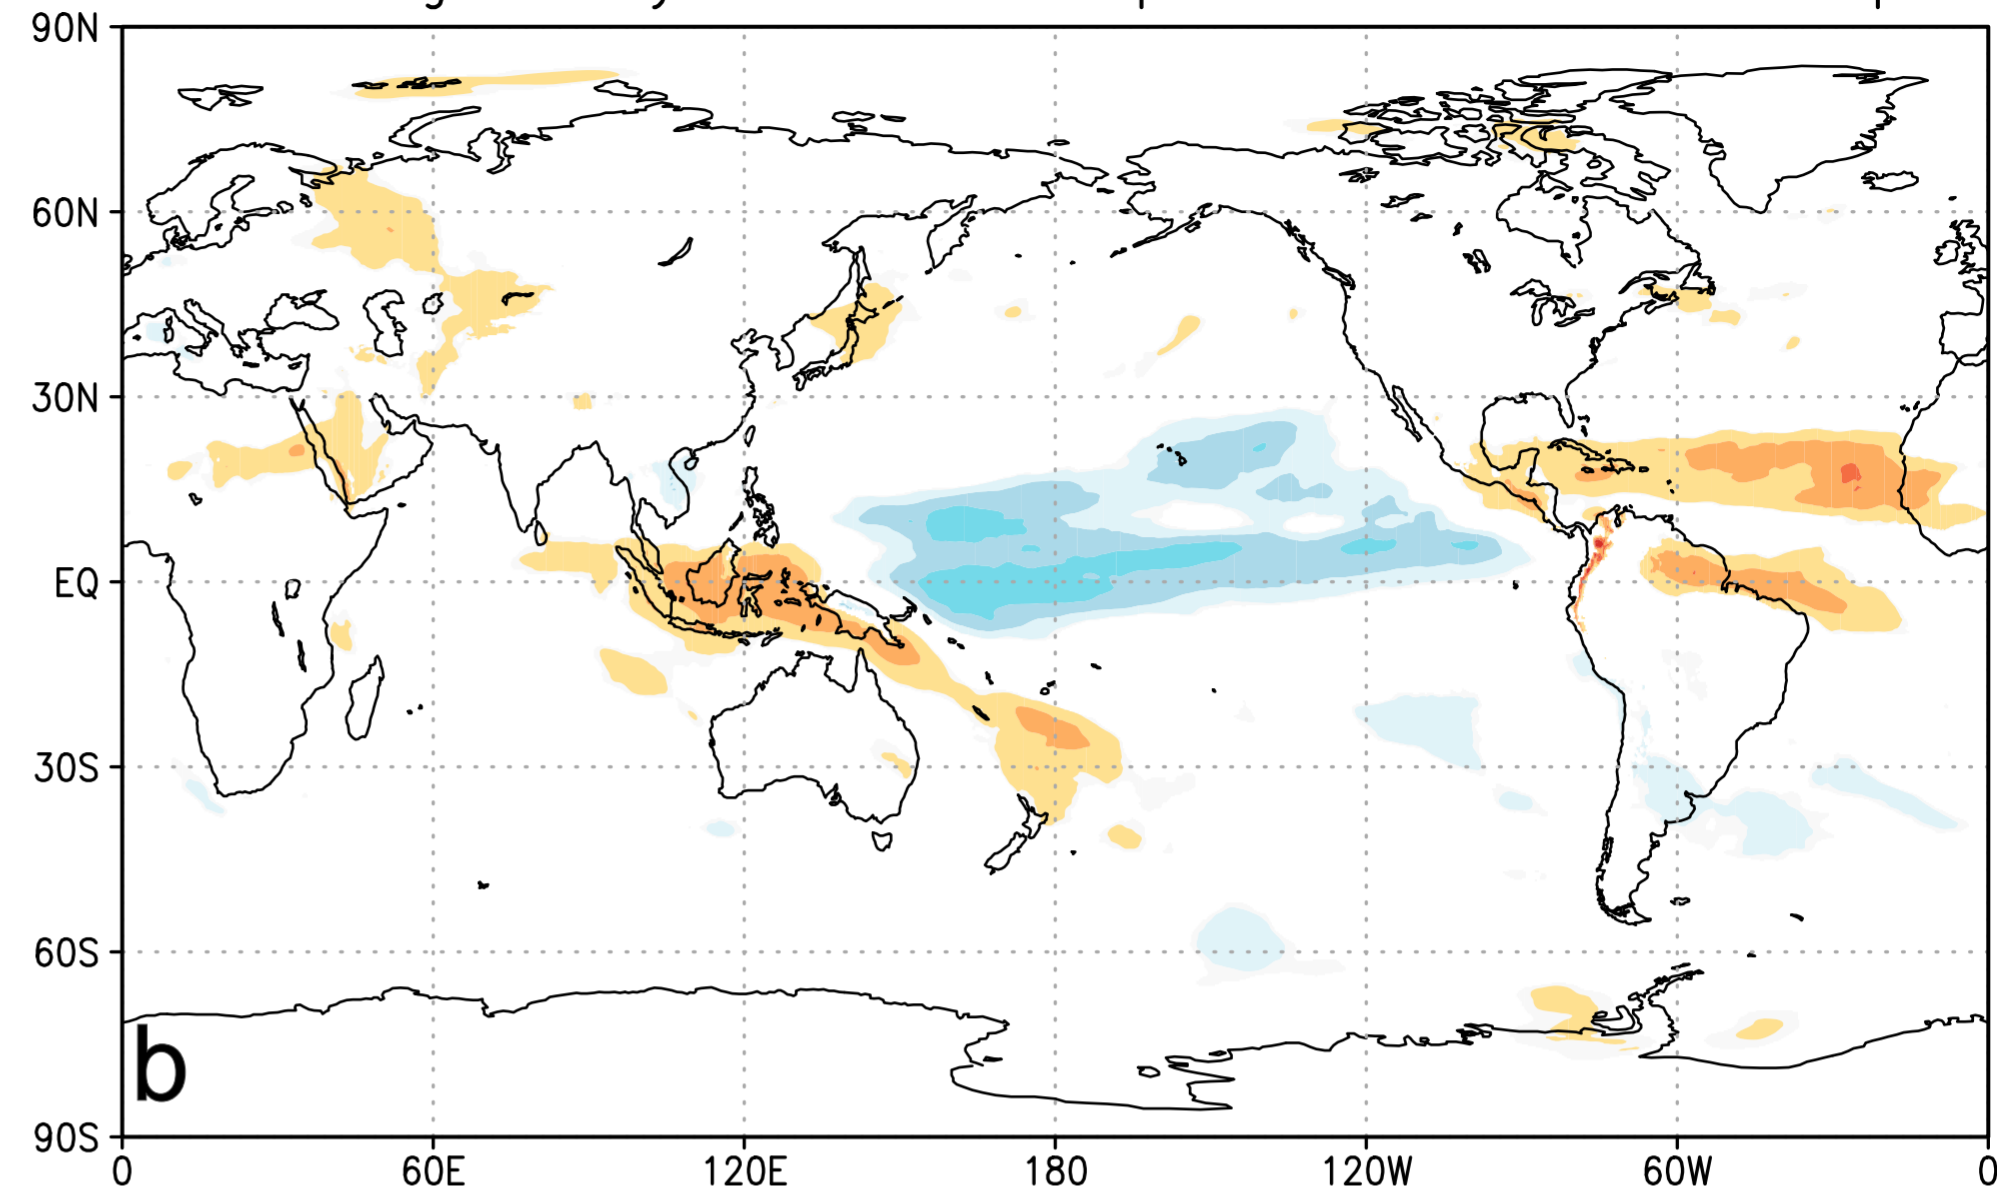

corr Dec–Feb monthly Mistrato precipitation anomalies  
with Dec–Feb monthly HadISST1 SST anomalies 1976:2015  $p < 5\%$

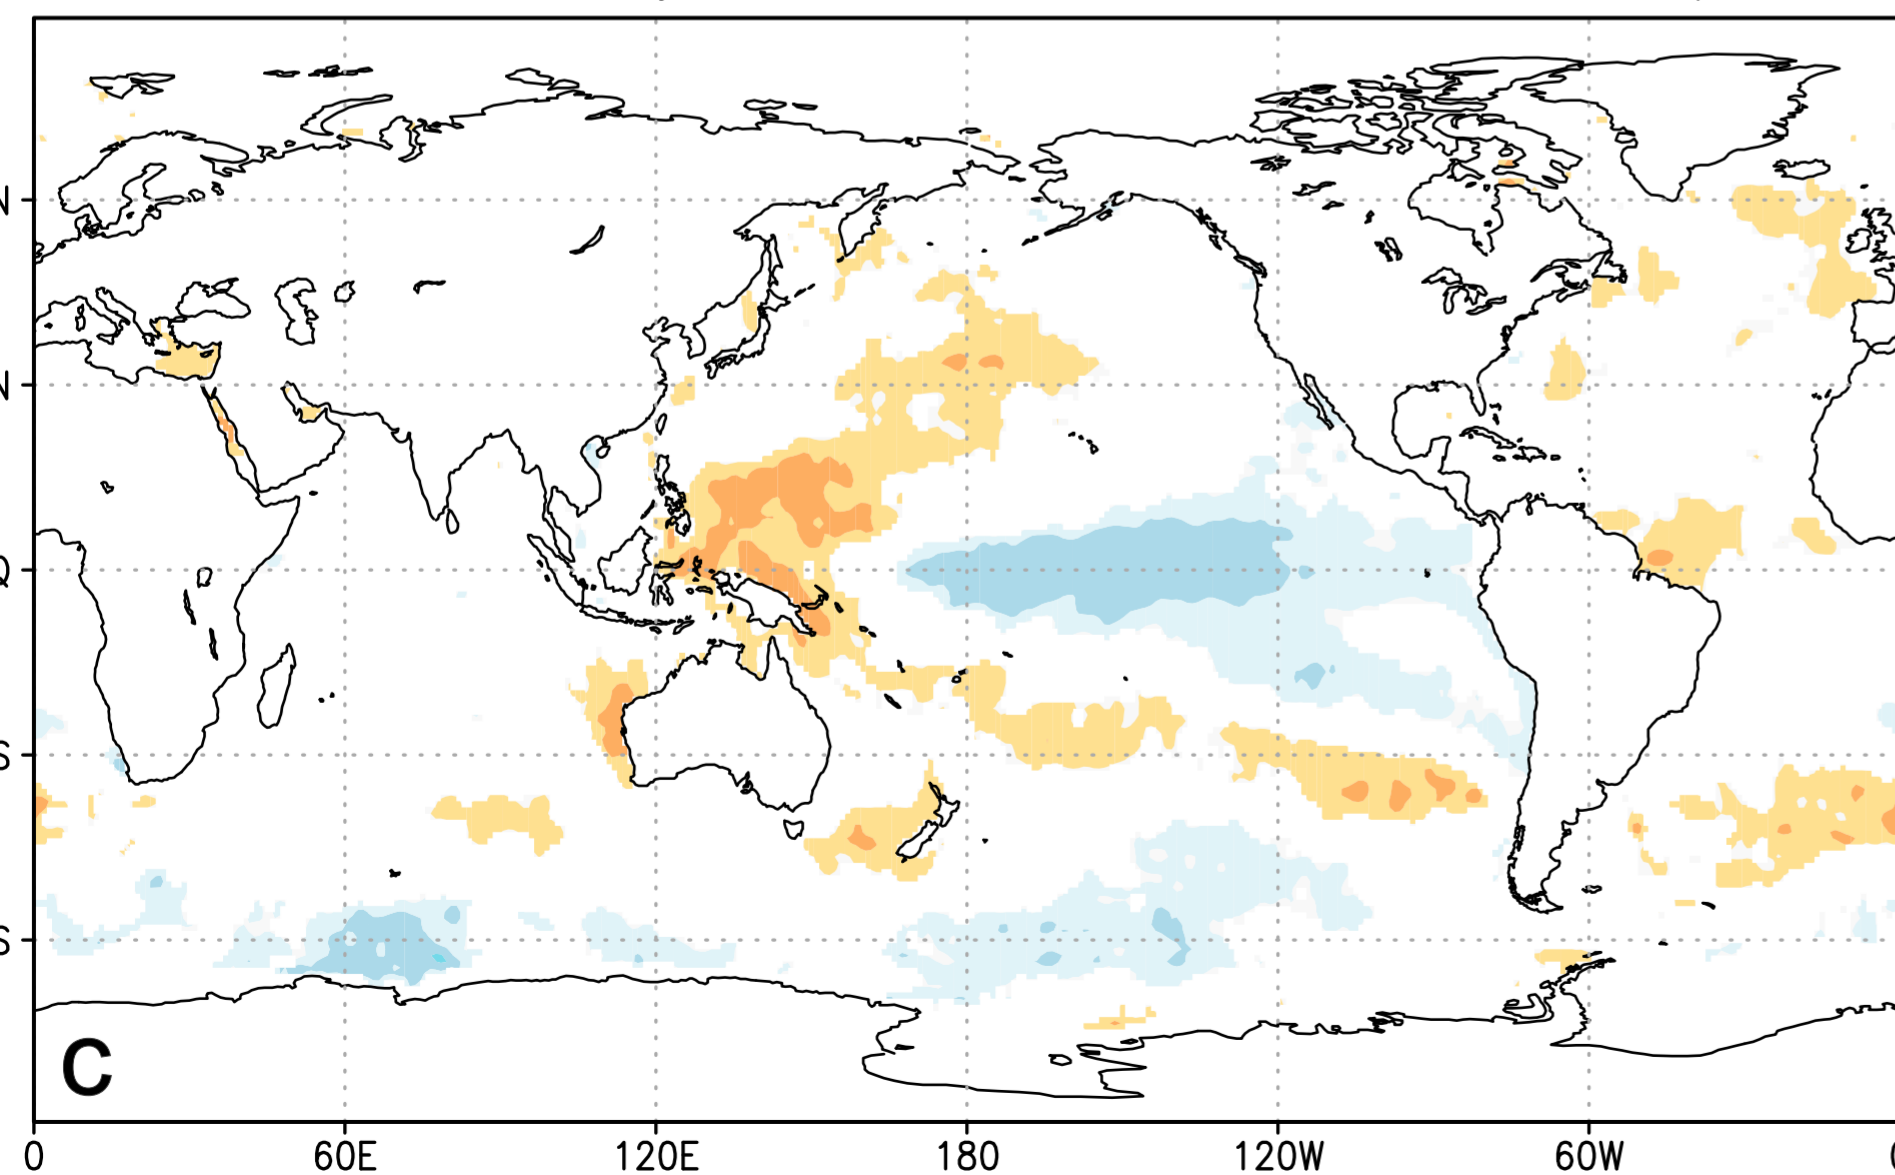

corr Dec–Feb monthly Mistrato precipitation anomalies  
with Dec–Feb monthly ERA5 column vapour anomalies 1976:2015  $p < 5\%$

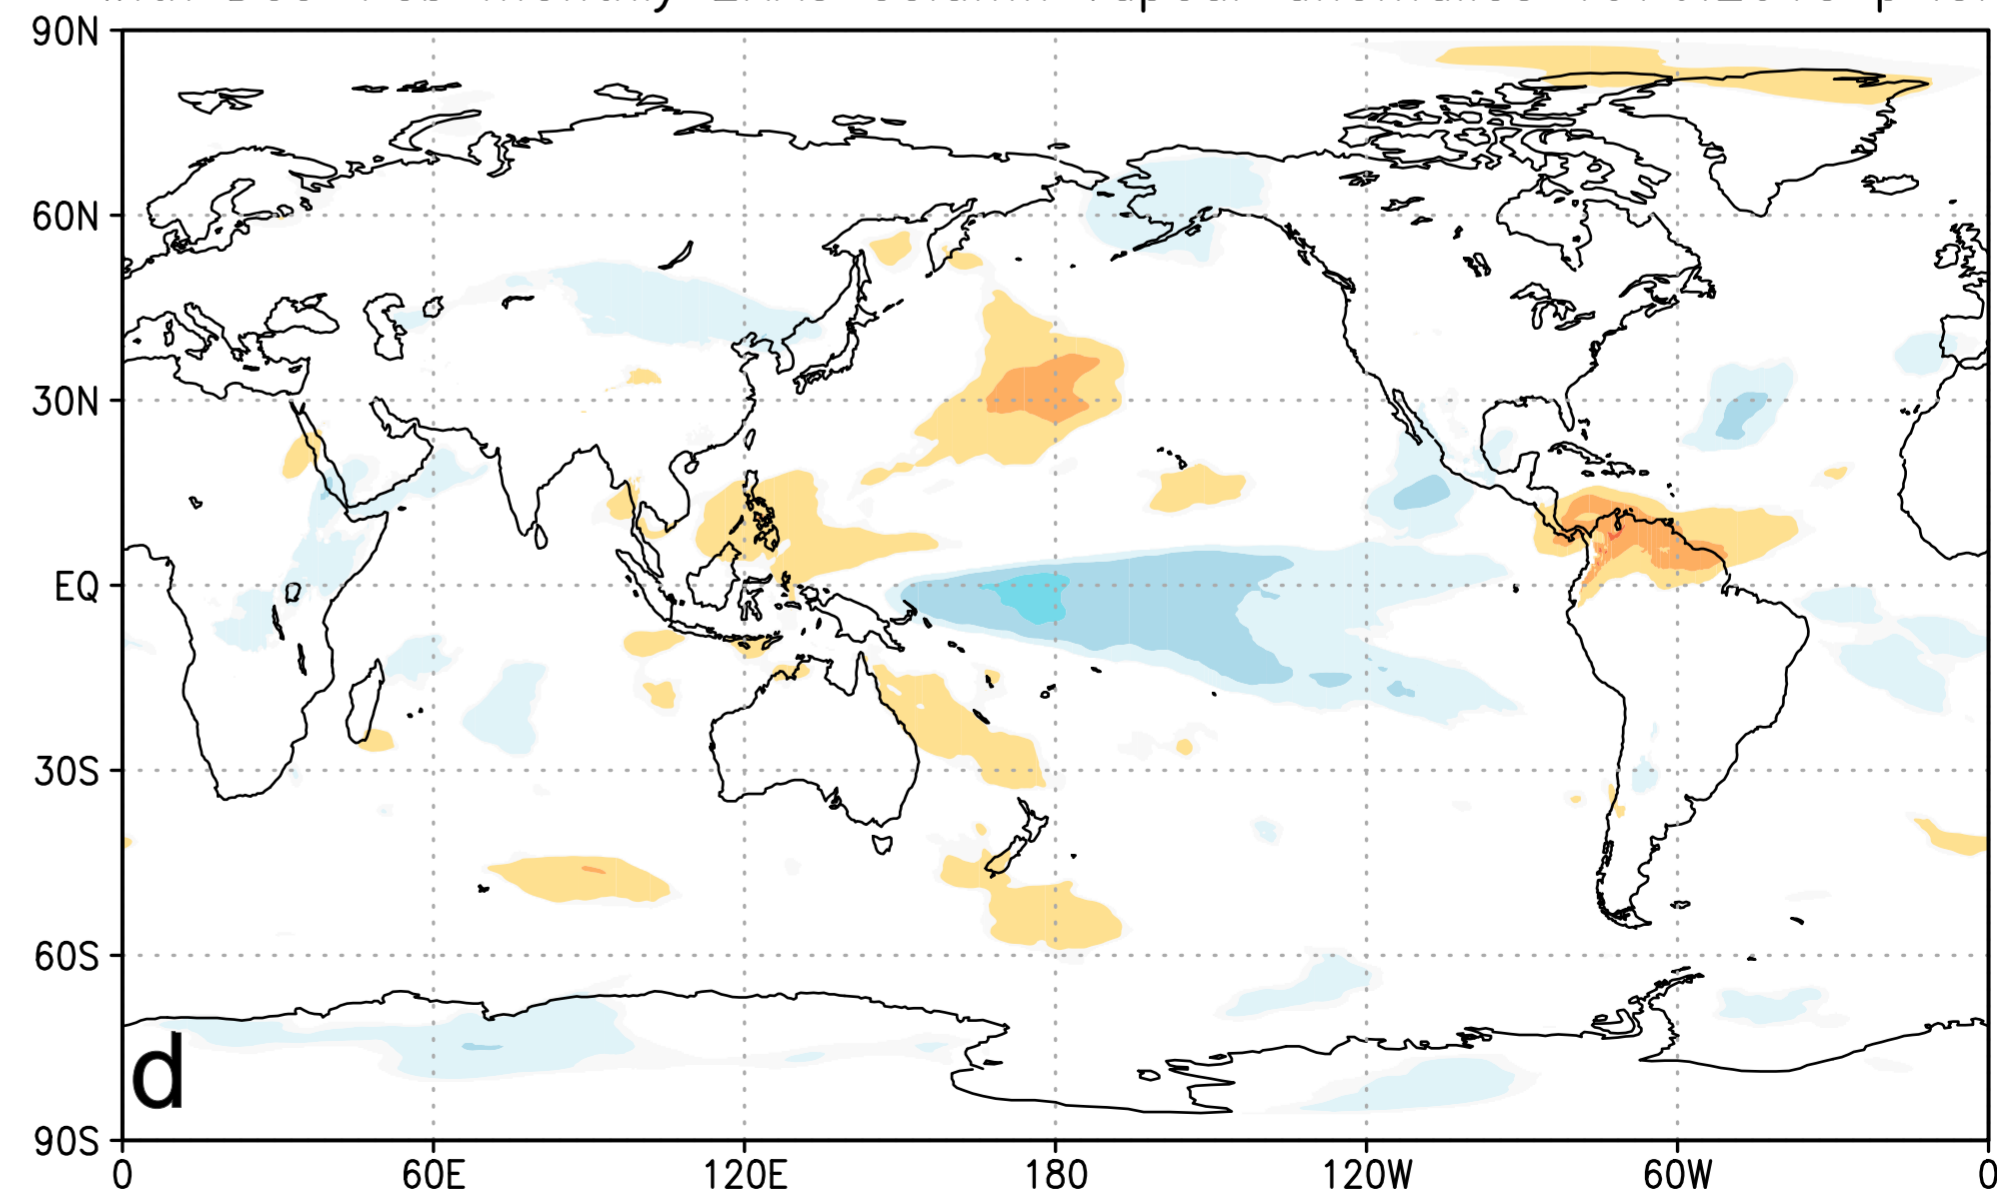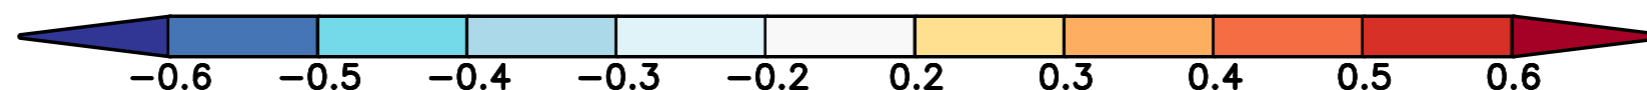

Supplement: Supplementary file [file egusphere-2022-1428-AC3-supplement.pdf]
